# Supplementary material for: Bis(piperidinedithiocarbamato)pyridinecadmium(ii) as a single-source precursor for the synthesis of CdS nanoparticles and aerosol-assisted chemical vapour deposition (AACVD) of CdS thin films
Source: Royal Society of Chemistry journal article supplement (doi:10.1039/c4nj01201a), 2014-01-01
Supplement: c4nj01201a1.pdf [file c4nj01201a1.pdf]

## Electronic Supplementary Information

### *Bis*(piperidinedithiocarbamato)pyridinecadmium(II) as a Single-Source Precursor for the Synthesis of CdS Nanoparticles and Aerosol-Assisted Chemical Vapour Deposition (AACVD) of CdS thin films

Sixberth Mlowe,<sup>a,b</sup> David J. Lewis,<sup>b</sup> Azad M. Malik,<sup>b</sup> James Raftery,<sup>b</sup> Egid B. Mubofu,<sup>c</sup> Paul O'Brien<sup>b</sup> and Neerish Revaprasadu<sup>a\*</sup>

<sup>a</sup> Department of Chemistry, University of Zululand, Private Bag X1001, Kwa-Dlangezwa, 3886, South Africa. Ph: + 27 35 902 6152; Fax: + 27 35 902 6568, RevaprasaduN@unizulu.ac.za

<sup>b</sup> Schools of Chemistry and Materials Science, The University of Manchester, Oxford Road, Manchester, M13 9PL, United Kingdom.

<sup>c</sup> Department of Chemistry, University of Dar es Salaam, P.O. Box 35061, Dar es Salaam, Tanzania.

\*Corresponding author

E-mail: [RevaprasaduN@unizulu.ac.za](mailto:RevaprasaduN@unizulu.ac.za)

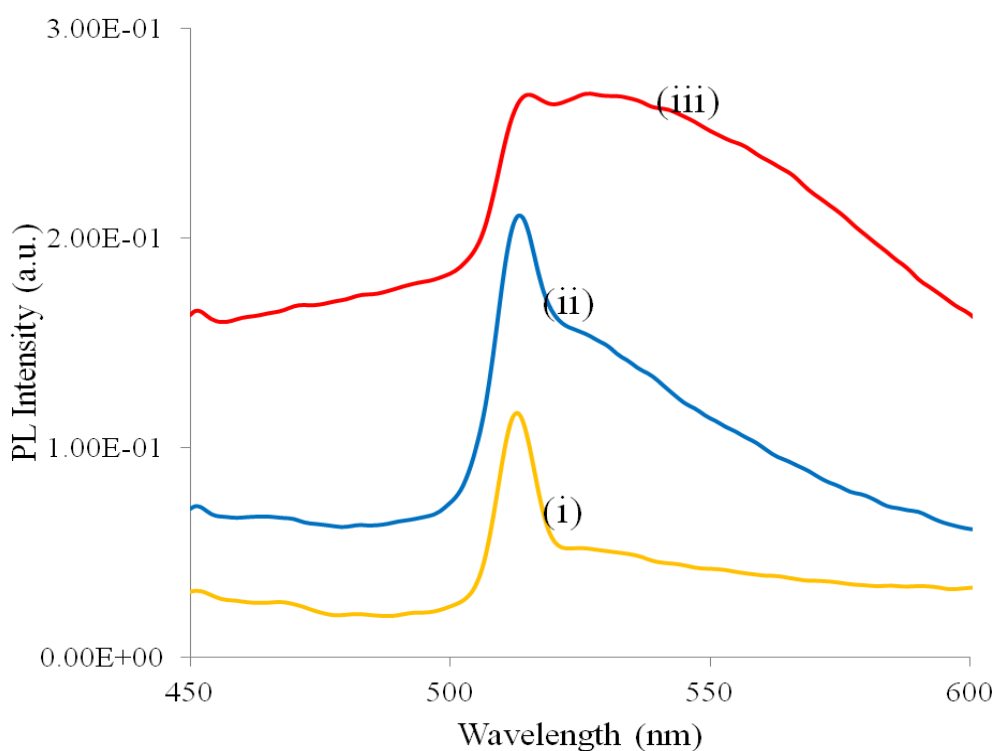

**Fig. S1.** Photoluminescence emission spectra of CdS thin films deposited at (i) 350, (ii) 400 and (iii) 450 °C ( $\lambda_{\text{exc}} = 350$  nm). Spectra are corrected for instrument response.

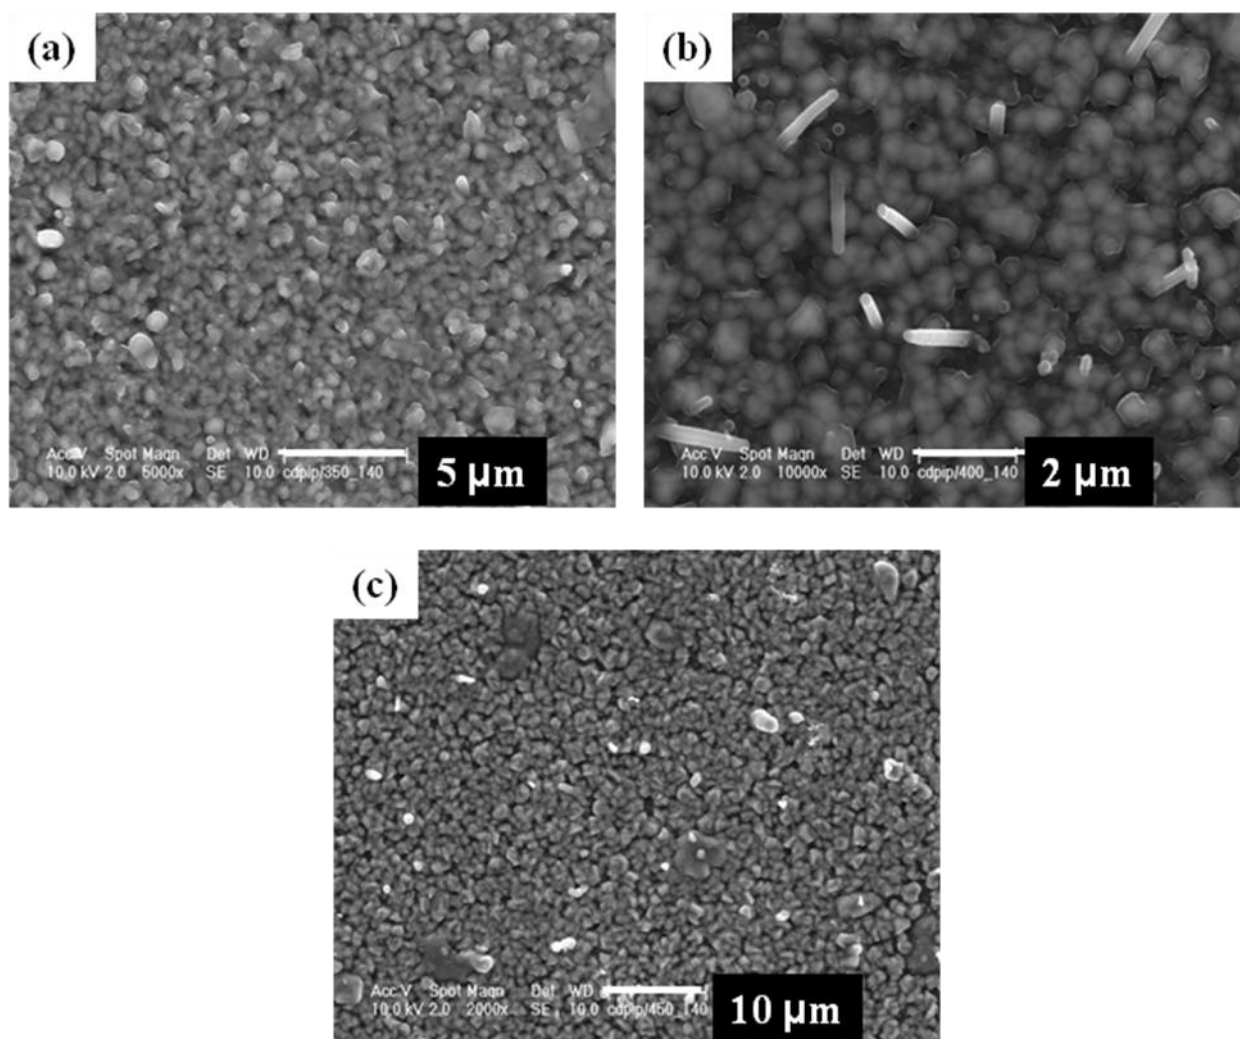

**Fig. S2.** SEM images of CdS thin films deposited using the parent single source precursor (bis(piperidinedithiocarbamatocadmium(II))) at (a) 350 °C, Magn. 5000×; (b) 400 °C, Magn. 10000× and (c) 450 °C, Magn. 2000×.
